# Supplementary material for: Dynamic response of RNA editing to temperature in Drosophila
Source: PubMed Central journal article supplement (PMC4299485; doi:10.1186/s12915-014-0111-3), 2015-01-03
Supplement: 12915_2014_111_MOESM1_ESM.pdf [file 12915_2014_111_MOESM1_ESM.pdf]

\* = intron location

A = editing site

**adar (CG12598):**

CAGCACCTTGTGGGGATGCACGGATATTT<sup>A</sup><sup>1</sup>GTCCTCACGAAAACGACACTGG  
TGTTGATAAAC

**caps (CG33653):**

GACACAAGGTCTAAGCGGTAAACTT<sup>A</sup><sup>1</sup>TGTCTGTGCTAGAGTCGACTTTGTC

**caID (CG4894):**

CAGCGGAATGTGTTATGAAAATTTT<sup>A</sup><sup>1</sup>GCATATGGTTTTGTGTTACAT<sup>A</sup><sup>2</sup>ATGG  
TGCATATCT<sup>A</sup><sup>3</sup><sup>A</sup><sup>4</sup>GAAATGGATGGAATTTATTAGATTTTATTAGATTTTACAAT  
TGTAGTTAT<sup>A</sup><sup>5</sup>GG\*GGCGATAAGTACTGCACTCTCCC

**cpx (CG32490):**

AACTGAAAAATCAAAT<sup>A</sup><sup>1</sup>GAAACGCAAGTA<sup>A</sup><sup>2</sup><sup>A</sup><sup>3</sup>TGAGCTAAAAACTCAAATA  
GAGGGAAAAATGTGTCATGCAGTGA

**da5 (CG32975):**

CTACTTCCGATGCGGTGCCATTGCTGG\*GT<sup>A</sup><sup>1</sup>CATATTTCAATTGCATAATGTT  
TATGGTAGCTTCATCCGTTGTGTCAACGATTTT<sup>A</sup><sup>2</sup><sup>A</sup><sup>3</sup>TATTAAATTATCATCATC  
GAAATGC

TGACAGACTGTGCCTTATCATATTCACAATGTTT<sup>A</sup><sup>4</sup>CA<sup>A</sup><sup>5</sup>TATT<sup>A</sup><sup>6</sup>GCCACAAT  
<sup>A</sup><sup>7</sup>GCTGTACTACT<sup>A</sup><sup>8</sup>TC<sup>A</sup><sup>9</sup>GCACCACATATTATTGTCTCGT

**dop (CG18314):**

AACTGCTCTGGCTGAAA<sup>A</sup><sup>1</sup>TTT<sup>A</sup><sup>2</sup>TCGAACCCT<sup>A</sup><sup>3</sup>GTCAT<sup>A</sup><sup>4</sup>TGATGTCATTTCGC  
ATT<sup>A</sup><sup>5</sup>GTCTTTGCATTCTGGGTGTCCTGGCTGCCATGGATTCTG

TGCTTAACCATTTGTTGTAAGACT<sup>A</sup><sup>6</sup>AGGGCCGTTTGCAAGCAGAGCT<sup>A</sup><sup>8</sup><sup>A</sup><sup>9</sup>TC  
GGGTTGGACCCAGATGACT<sup>A</sup><sup>10</sup>GAGTTAGATTTAGATTTTCATTCTCC

**eag (CG10952):**

CTGGATACCGAGAAG\*GTACTAAACT<sup>A</sup><sup>2</sup>TTGTCCGAAAGATATGAAGGCTGAC  
TATGTGTTTCATCTAAATCGCAAAGT<sup>A</sup><sup>5</sup>TTT<sup>A</sup><sup>4</sup>ACGAGCATCCGGC<sup>A</sup><sup>5</sup>TTTCGTCT  
GGCTCGGATGGTTGTC

CTCAGACATCGACTGATTTTTTCGCA<sup>A</sup><sup>6</sup>GGTGGCCGATGTGAAGCGCGAAAAA

**para (CG9907):**

CAATTTACGACTGAAAACCTTTTC<sup>A</sup><sup>1</sup>ATTAATTGA<sup>A</sup><sup>2</sup><sup>A</sup><sup>3</sup>ATAAATATTTTGAAAC  
AGCTGTTATCACTATG

**rdl (CG10537):**

GTCAATTTTGACCGATCCTCGTTT<sup>A</sup><sup>1</sup>GCGTAT<sup>A</sup><sup>2</sup>GAAAACGACCTGGTGTAGAA  
AACT

CTACATACCCTCTGGACTGATCGTT<sup>A</sup><sup>3</sup>TTATATCATGGGTATCATTTTGGCTAT  
GGGTATCATTTTGGCTCAATCGC<sup>A</sup><sup>4</sup>ATGCAACGCCGGCGCGTGTGGCGT

GTCGGCTACATGGCAAACGAATTCA<sup>A</sup><sup>5</sup><sup>A</sup><sup>6</sup>TGCGAAAACAAAGATTTATGGCG  
AT

**sbd (CG6798):**

GCCCAGCGATTCGGGCGAAAAG\*GTT<sup>A</sup><sup>1</sup>CGTT<sup>A</sup><sup>2</sup>TGTATTTGATACTCGTGTC

**shab (CG1066):**

TCGTTTCAATACCGGAA<sup>A</sup><sup>3</sup>CATTTTGGTGGGCGGGTATTACAATGACAACCTGT  
TGGCTACGGGGACATCT<sup>A</sup><sup>4</sup>TCCCACAACCTGCACTGGGAAAGGTTATTGGT<sup>A</sup><sup>5</sup>C

CTGTGTGTTGCATATGCGGTGTTCTGGT<sup>A</sup><sup>6</sup><sup>A</sup><sup>7</sup>TCGCTTTGCCTATTCCCATCATC  
GTTAACAATTTTGCTGAATTTTATAAGAATCAG

**stn (CG40306):**

GTTTACTATGCCCGCCACGCAGGTCTCCCAT<sup>A</sup><sup>1</sup>CCACCGTGCCTCGGTGAGT  
GTCCAGGATTCGGATGGCGATGAACCGC

**syt (CG3139):**

TTGAAGAAGATGGACGTGGGCGGATTGTCTG\*ATCCATATGTGAAAATTGCA  
ATCATGCAAAAATGGCAAACGTTTGAAAAAGA<sup>A</sup><sup>2</sup>GAAGACAAGT<sup>A</sup><sup>3</sup>TCAAAAA  
ATGCACCCTCAACCCTTACTATAATGAGTCGTTCTCATTGAAAGTACCATTG  
AACAAAT<sup>A</sup><sup>4</sup>CAA\*AAAATCTGTCTCGTTGTGACCGTCGTGGACTACGATCGTA  
TTGGCACCTCCGAACCCATCGGCCGCTG

**unc (CG2999):**

ACGCAATTGACGCAGTGTTTCGATGTTGTT<sup>A</sup><sup>1</sup>GCAAACCTCGAGTGTCCCTGATC  
CAGAAATTTGGA
