# Supplementary material for: Dynamic response of RNA editing to temperature in Drosophila
Source: PubMed Central journal article supplement (PMC4299485; doi:10.1186/s12915-014-0111-3), 2015-01-03
Supplement: 12915_2014_111_MOESM3_ESM.pdf [file 12915_2014_111_MOESM3_ESM.pdf]

| Editing Site | Amino Acid Change | Editing 10°C | Different from 20°C? P-value | Standard Error 10°C | Editing 20°C | Standard Error 20°C | Editing 30°C | Different from 20°C? P-value | Standard Error 30°C |
|--------------|-------------------|--------------|------------------------------|---------------------|--------------|---------------------|--------------|------------------------------|---------------------|
| adar         | S>G               | 0.549665     | 0.935                        | 0.007059            | 0.545110     | 0.013444            | 0.372067     | < .0001 (**)                 | 0.016540            |
| calD Site1   | L>L               | 0.237233     | < .0001 (**)                 | 0.009473            | 0.372823     | 0.003000            | 0.248833     | < .0001 (**)                 | 0.007769            |
| calD Site2   | N>D               | 1.000000     | 0.0163 (*)                   | 0.000000            | 0.981133     | 0.006343            | 0.940610     | 0.0001 (*)                   | 0.002874            |
| calD Site3   | L>L               | 0.991125     | 0.8749                       | 0.003020            | 0.985658     | 0.005091            | 0.272010     | < .0001 (**)                 | 0.014285            |
| calD Site4   | R>G               | 1.000000     | ~                            | 0.000000            | 1.000000     | 0.000000            | 0.338808     | < .0001 (**)                 | 0.014898            |
| calD Site5   | I>M               | 1.000000     | ~                            | 0.000000            | 1.000000     | 0.000000            | 0.955468     | 0.0001 (*)                   | 0.007825            |
| caps         | M>V               | 0.309370     | < .0001 (**)                 | 0.010776            | 0.491833     | 0.011842            | 0.329465     | < .0001 (**)                 | 0.004995            |
| cpx Site1    | I>M               | 0.534008     | 0.0227 (*)                   | 0.010918            | 0.600728     | 0.024374            | 0.340290     | < .0001 (**)                 | 0.007756            |
| cpx Site2    | N>D, G, S         | 0.114689     | 0.0053 (*)                   | 0.007548            | 0.163683     | 0.014128            | 0.052531     | < .0001 (**)                 | 0.003234            |
| cpx Site3    | N>D, G, S         | 0.293040     | 0.0007 (*)                   | 0.005055            | 0.393768     | 0.017210            | 0.185013     | < .0001 (**)                 | 0.018437            |
| da5 Site1    | T>A               | 0.357793     | < .0001 (**)                 | 0.020199            | 0.162568     | 0.004385            | 0.092082     | 0.0059 (*)                   | 0.006539            |
| da5 Site2    | L>L               | 0.855310     | 0.0002 (*)                   | 0.006437            | 0.907578     | 0.003632            | 0.855050     | 0.0002 (*)                   | 0.006235            |
| da5 Site3    | I>V               | 0.840973     | 0.0019 (*)                   | 0.012122            | 0.903733     | 0.004749            | 0.818390     | 0.0002 (*)                   | 0.009595            |
| da5 Site4    | T>A               | 1.000000     | < .0001 (**)                 | 0.000000            | 0.975183     | 0.002656            | 1.000000     | < .0001 (**)                 | 0.000000            |
| da5 Site5    | I>V               | 0.407008     | < .0001 (**)                 | 0.001345            | 0.584423     | 0.020473            | 0.272848     | < .0001 (**)                 | 0.003531            |
| da5 Site6    | L>L               | 0.343043     | < .0001 (**)                 | 0.011512            | 0.483670     | 0.008016            | 0.269750     | < .0001 (**)                 | 0.006267            |
| da5 Site7    | I>M               | 0.785935     | < .0001 (**)                 | 0.007740            | 0.845803     | 0.005937            | 0.590265     | < .0001 (**)                 | 0.002869            |
| da5 Site8    | L>L               | 0.186585     | 0.2537                       | 0.004012            | 0.193050     | 0.002494            | 0.107455     | < .0001 (**)                 | 0.001833            |
| da5 Site9    | S>S               | 0.901715     | 0.1492                       | 0.025103            | 0.859548     | 0.008505            | 0.657590     | < .0001 (**)                 | 0.004567            |
| dop Site1    | M>S               | 0.529770     | < .0001 (**)                 | 0.013331            | 0.134315     | 0.001866            | 0.000000     | < .0001 (**)                 | 0.000000            |
| dop Site2    | L>L               | 0.174853     | < .0001 (**)                 | 0.007973            | 0.089606     | 0.004308            | 0.000000     | < .0001 (**)                 | 0.000000            |
| dop Site3    | S>G               | 0.237710     | < .0001 (**)                 | 0.008660            | 0.141588     | 0.004565            | 0.076920     | < .0001 (**)                 | 0.001577            |
| dop Site4    | M>V               | 0.128338     | < .0001 (**)                 | 0.004572            | 0.022076     | 0.003727            | 0.024078     | 0.9705                       | 0.010563            |
| dop Site5    | L>L               | 0.444070     | < .0001 (**)                 | 0.013282            | 0.337945     | 0.003585            | 0.248388     | < .0001 (**)                 | 0.004278            |
| dop Site6    | K>E               | 0.066300     | 0.9989                       | 0.006121            | 0.065970     | 0.004193            | 0.007558     | 0.0002 (*)                   | 0.007558            |
| dop Site8    | L>L               | 0.322855     | 0.0002 (*)                   | 0.016490            | 0.451705     | 0.004281            | 0.287660     | < .0001 (**)                 | 0.016115            |
| dop Site9    | I>V               | 0.723980     | 0.4687                       | 0.013523            | 0.706638     | 0.003705            | 0.692520     | 0.5913                       | 0.013271            |
| dop Site10   | STOP>W            | 0.859848     | 0.0047 (*)                   | 0.005096            | 0.831450     | 0.006402            | 0.721498     | < .0001 (**)                 | 0.001941            |
| eag Site1    | K>R               | 0.885048     | < .0001 (**)                 | 0.002357            | 0.923245     | 0.001705            | 0.899740     | 0.0007 (*)                   | 0.004349            |
| eag Site3    | Y>C               | 0.120850     | 0.296                        | 0.003849            | 0.135643     | 0.008714            | 0.283015     | < .0001 (**)                 | 0.005747            |
| eag Site4    | N>D               | 0.858725     | 0.0075 (*)                   | 0.007099            | 0.895718     | 0.003452            | 0.870675     | 0.0523                       | 0.008855            |
| eag Site5    | A>A               | 0.103175     | 0.4051                       | 0.015052            | 0.082200     | 0.004012            | 0.086708     | 0.9515                       | 0.014225            |
| eag Site6    | K>R               | 0.631950     | 0.0066 (*)                   | 0.002395            | 0.703365     | 0.010160            | 0.559813     | < .0001 (**)                 | 0.019808            |
| para Site1   | Q>R               | 0.574788     | 0.0489 (*)                   | 0.012263            | 0.603035     | 0.003495            | 0.077853     | < .0001 (**)                 | 0.003272            |
| para Site2   | E>E               | 0.427688     | 0.0015 (*)                   | 0.005495            | 0.359890     | 0.015862            | 0.023668     | < .0001 (**)                 | 0.001631            |
| para Site3   | N>D               | 0.611950     | 0.0429 (*)                   | 0.006921            | 0.590178     | 0.006666            | 0.095427     | < .0001 (**)                 | 0.002114            |
| rdl Site1    | L>L               | 0.379303     | < .0001 (**)                 | 0.011081            | 0.235075     | 0.014452            | 0.047065     | < .0001 (**)                 | 0.003903            |
| rdl Site2    | R>G               | 0.686455     | 0.034 (*)                    | 0.011967            | 0.648798     | 0.008362            | 0.598450     | 0.0075 (*)                   | 0.006913            |
| rdl Site3    | I>V               | 0.900925     | < .0001 (**)                 | 0.005643            | 0.969828     | 0.002141            | 0.986093     | 0.0206 (*)                   | 0.001746            |
| rdl Site4    | N>D               | 0.068337     | < .0001 (**)                 | 0.008534            | 0.179903     | 0.011349            | 0.253795     | 0.0008 (*)                   | 0.009036            |
| rdl Site5    | Q>Q               | 0.000000     | 0.7636                       | 0.000000            | 0.014831     | 0.014813            | 0.007077     | 0.8573                       | 0.007077            |
| rdl Site6    | M>V               | 0.055320     | < .0001 (**)                 | 0.007584            | 0.177588     | 0.006822            | 0.077678     | < .0001 (**)                 | 0.002664            |
| sbd Site1    | T>A               | 0.452693     | < .0001 (**)                 | 0.012024            | 0.243675     | 0.008129            | 0.308868     | 0.0008 (*)                   | 0.002057            |
| sbd Site2    | L>L               | 0.438240     | < .0001 (**)                 | 0.015300            | 0.251110     | 0.006769            | 0.268070     | 0.4141                       | 0.004414            |
| shab Site3   | T>A               | 0.836283     | 0.0001 (*)                   | 0.014548            | 0.936400     | 0.005527            | 0.732340     | < .0001 (**)                 | 0.007150            |
| shab Site4   | Y>C               | 0.923210     | 0.0005 (*)                   | 0.007666            | 0.961603     | 0.002324            | 0.977340     | 0.0738                       | 0.001405            |
| shab Site5   | T>A               | 0.745360     | 0.0006 (*)                   | 0.011127            | 0.807268     | 0.006643            | 0.668873     | < .0001 (**)                 | 0.003580            |
| shab Site6   | V>V               | 0.441410     | < .0001 (**)                 | 0.006888            | 0.700350     | 0.002017            | 0.830005     | < .0001 (**)                 | 0.003784            |
| shab Site7   | I>V               | 0.955945     | 0.161                        | 0.014172            | 0.978208     | 0.002529            | 0.974525     | 0.9331                       | 0.002294            |
| stn          | T>A               | 0.866243     | 0.864                        | 0.017713            | 0.874500     | 0.009670            | 0.646270     | < .0001 (**)                 | 0.009484            |
| syt Site2    | K>R               | 0.221473     | 0.0029 (*)                   | 0.013892            | 0.325963     | 0.020500            | 0.302115     | 0.5765                       | 0.018800            |
| syt Site3    | I>V               | 0.485738     | 0.0216 (*)                   | 0.007975            | 0.533233     | 0.007916            | 0.523770     | 0.7874                       | 0.013602            |
| syt Site4    | I>M               | 0.790057     | 0.0021 (*)                   | 0.009578            | 0.847488     | 0.004957            | 0.809523     | 0.03 (*)                     | 0.009810            |
| unc          | S>G               | 0.656645     | < .0001 (**)                 | 0.003956            | 0.753738     | 0.004696            | 0.433482     | < .0001 (**)                 | 0.014084            |

| Key      |
|----------|
| 1.000000 |
| 0.750000 |
| 0.500000 |
| 0.250000 |
| 0.000000 |
