# Supplementary material for: Dynamic response of RNA editing to temperature in Drosophila
Source: PubMed Central journal article supplement (PMC4299485; doi:10.1186/s12915-014-0111-3), 2015-01-03

**A. Complexin (*cpx*) sites 1-3**

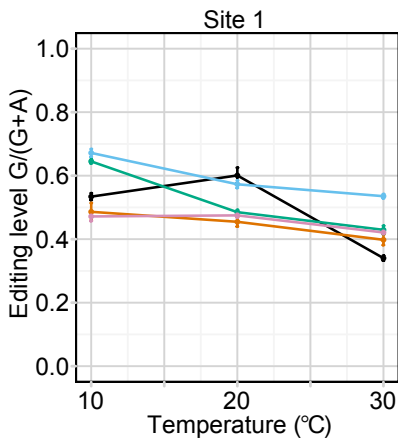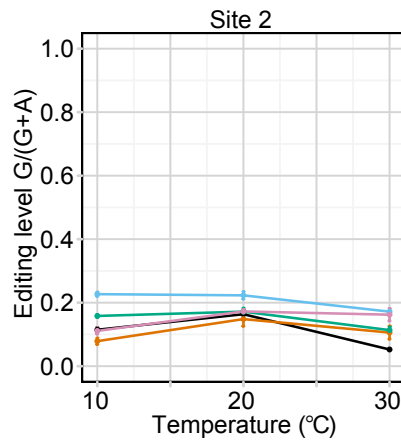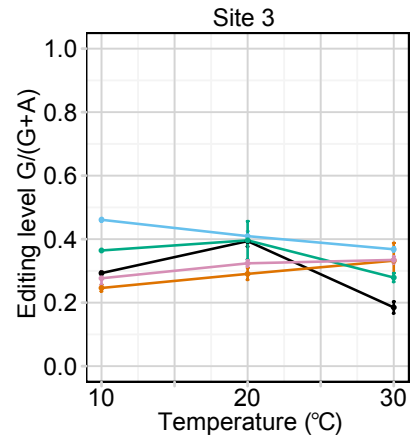

**B. Dadar (*adr*)**

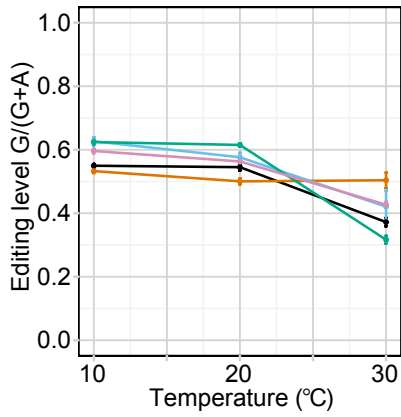

**C. Uncoordinated-13 (*unc*)**

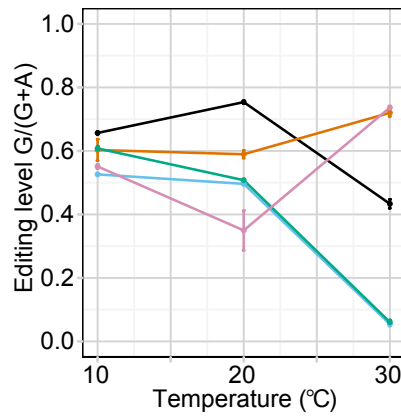

**D**

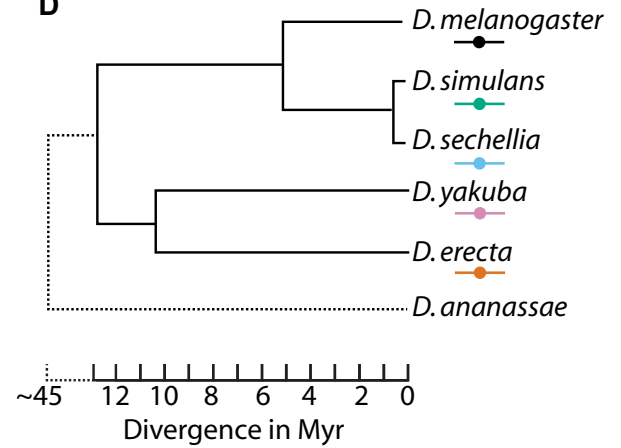

Supplement: 12915_2014_111_MOESM5_ESM.pdf [file 12915_2014_111_MOESM5_ESM.pdf]
