# Supplementary material for: Dynamic response of RNA editing to temperature in Drosophila
Source: PubMed Central journal article supplement (PMC4299485; doi:10.1186/s12915-014-0111-3), 2015-01-03
Supplement: 12915_2014_111_MOESM6_ESM.pdf [file 12915_2014_111_MOESM6_ESM.pdf]

| Editing Site | Species                | Standard     |             | Slope 10-20°C       |              | Standard    |              | Standard    |                     | Slope 20-30°C |  | Key |
|--------------|------------------------|--------------|-------------|---------------------|--------------|-------------|--------------|-------------|---------------------|---------------|--|-----|
|              |                        | Editing 10°C | Error 10°C  | Different from mel? | Editing 20°C | Error 20°C  | Editing 30°C | Error 30°C  | Different from mel? |               |  |     |
| adar         | <i>D. melanogaster</i> | 0.54967      | 0.00576     | ~                   | 0.54511      | 0.01098     | 0.37207      | 0.01350     | ~                   | 1.000000      |  |     |
|              | <i>D. erecta</i>       | 0.53272      | 0.00614     | 0.40920             | 0.50050      | 0.00949     | 0.54310      | 0.02415     | <0.0001 (**)        | 0.750000      |  |     |
|              | <i>D. sechellia</i>    | 0.63242      | 0.00834     | <0.0001 (**)        | 0.57624      | 0.01410     | 0.34728      | 0.02153     | <0.0001 (**)        | 0.500000      |  |     |
|              | <i>D. simulans</i>     | 0.62415      | 0.00774     | 0.26540             | 0.61518      | 0.00472     | 0.31674      | 0.01236     | <0.0001 (**)        | 0.250000      |  |     |
|              | <i>D. yakuba</i>       | 0.59612      | 0.00717     | 0.0014 (*)          | 0.56312      | 0.01630     | 0.42687      | 0.00949     | 0.0031 (*)          | 0.000000      |  |     |
| cpx Site1    | <i>D. melanogaster</i> | 0.53401      | 0.01092     | ~                   | 0.60073      | 0.02437     | 0.34029      | 0.00776     | ~                   | ~             |  |     |
|              | <i>D. erecta</i>       | 0.48615      | 0.02787     | <0.0001 (**)        | 0.45475      | 0.01502     | 0.39807      | 0.01671     | <0.0001 (**)        | ~             |  |     |
|              | <i>D. sechellia</i>    | 0.67171      | 0.01116     | <0.0001 (**)        | 0.57289      | 0.01182     | 0.53536      | 0.00685     | <0.0001 (**)        | ~             |  |     |
|              | <i>D. simulans</i>     | 0.64488      | 0.00630     | <0.0001 (**)        | 0.48509      | 0.00722     | 0.42739      | 0.01280     | <0.0001 (**)        | ~             |  |     |
|              | <i>D. yakuba</i>       | 0.47162      | 0.01481     | <0.0001 (**)        | 0.47495      | 0.00693     | 0.42117      | 0.00325     | <0.0001 (**)        | ~             |  |     |
| cpx Site2    | <i>D. melanogaster</i> | 0.11469      | 0.00755     | ~                   | 0.16368      | 0.01413     | 0.05253      | 0.02627     | ~                   | ~             |  |     |
|              | <i>D. erecta</i>       | 0.07880      | 0.01004     | 0.19260             | 0.14825      | 0.02224     | 0.10587      | 0.02068     | <0.0001 (**)        | ~             |  |     |
|              | <i>D. sechellia</i>    | 0.22686      | 0.00681     | <0.0001 (**)        | 0.22310      | 0.01178     | 0.17172      | 0.00345     | <0.0001 (**)        | ~             |  |     |
|              | <i>D. simulans</i>     | 0.15822      | 0.00437     | 0.0095 (*)          | 0.17176      | 0.01122     | 0.11756      | 0.00984     | 0.0009 (*)          | ~             |  |     |
|              | <i>D. yakuba</i>       | 0.11113      | 0.01000     | 0.58890             | 0.17237      | 0.00644     | 0.16220      | 0.01985     | <0.0001 (**)        | ~             |  |     |
| cpx Site3    | <i>D. melanogaster</i> | 0.29304      | 0.00506     | ~                   | 0.39377      | 0.01721     | 0.25913      | 0.05389     | ~                   | ~             |  |     |
|              | <i>D. erecta</i>       | 0.24624      | 0.01062     | 0.0055 (*)          | 0.29066      | 0.01887     | 0.33221      | 0.07081     | <0.0001 (**)        | ~             |  |     |
|              | <i>D. sechellia</i>    | 0.46095      | 0.00533     | <0.0001 (**)        | 0.40950      | 0.01543     | 0.36812      | 0.00630     | <0.0001 (**)        | ~             |  |     |
|              | <i>D. simulans</i>     | 0.36434      | 0.00174     | 0.0025 (*)          | 0.40264      | 0.06045     | 0.27906      | 0.01382     | 0.0021 (*)          | ~             |  |     |
|              | <i>D. yakuba</i>       | 0.27673      | 0.02058     | 0.0089 (*)          | 0.32386      | 0.00934     | 0.33458      | 0.01057     | <0.0001 (**)        | ~             |  |     |
| para Site1   | <i>D. melanogaster</i> | 0.574875     | 0.01226318  | ~                   | 0.603035     | 0.00349515  | 0.077853     | 0.003272211 | ~                   | ~             |  |     |
|              | <i>D. erecta</i>       | 0.536624     | 0.013958054 | <0.0001 (**)        | 0.471194     | 0.00450068  | 0            | 0           | 0.0009 (*)          | ~             |  |     |
|              | <i>D. sechellia</i>    | 0.420196667  | 0.012747327 | <0.0001 (**)        | 0.354312     | 0.04116774  | 0.136203333  | 0.01233858  | <0.0001 (**)        | ~             |  |     |
|              | <i>D. simulans</i>     | 0.462646667  | 0.031914545 | 0.0104 (*)          | 0.438422     | 0.015277    | 0.16323      | 0.019223242 | <0.0001 (**)        | ~             |  |     |
|              | <i>D. yakuba</i>       | 0.4313725    | 0.003847968 | 0.4042              | 0.434958     | 0.00457307  | 0            | 0           | <0.0001 (**)        | ~             |  |     |
| para Site2   | <i>D. melanogaster</i> | 0.4276875    | 0.00549525  | ~                   | 0.35989      | 0.0158617   | 0.023668     | 0.001630817 | ~                   | ~             |  |     |
|              | <i>D. erecta</i>       | 0.37919      | 0.005351817 | 0.0018 (*)          | 0.261768     | 0.00553301  | 0            | 0           | <0.0001 (**)        | ~             |  |     |
|              | <i>D. sechellia</i>    | 0.286753333  | 0.014587605 | 0.8504              | 0.207006     | 0.03297217  | 0.043048     | 0.001508603 | <0.0001 (**)        | ~             |  |     |
|              | <i>D. simulans</i>     | 0.402713333  | 0.031186835 | <0.0001 (**)        | 0.256912     | 0.00974026  | 0.1165694    | 0.018729042 | <0.0001 (**)        | ~             |  |     |
|              | <i>D. yakuba</i>       | 0.3087425    | 0.017724105 | 0.4779              | 0.22305      | 0.00624494  | 0.0100562    | 0.006167127 | <0.0001 (**)        | ~             |  |     |
| para Site3   | <i>D. melanogaster</i> | 0.61195      | 0.00692076  | ~                   | 0.5901775    | 0.00666621  | 0.095427     | 0.002113605 | ~                   | ~             |  |     |
|              | <i>D. erecta</i>       | 0.5705       | 0.008258061 | <0.0001 (**)        | 0.467476     | 0.00530796  | 0.035021     | 0.003922198 | <0.0001 (**)        | ~             |  |     |
|              | <i>D. sechellia</i>    | 0.442383333  | 0.00515442  | <0.0001 (**)        | 0.348028     | 0.03854251  | 0.124986667  | 0.00511156  | <0.0001 (**)        | ~             |  |     |
|              | <i>D. simulans</i>     | 0.45942      | 0.030718479 | 0.9997              | 0.43537      | 0.01405437  | 0.210172     | 0.014855958 | <0.0001 (**)        | ~             |  |     |
|              | <i>D. yakuba</i>       | 0.451715     | 0.008756283 | 0.7762              | 0.411782     | 0.00224506  | 0.0464202    | 0.003370992 | <0.0001 (**)        | ~             |  |     |
| shab Site6   | <i>D. melanogaster</i> | 0.44141      | 0.006887867 | ~                   | 0.70035      | 0.002017168 | 0.830005     | 0.003783958 | ~                   | ~             |  |     |
|              | <i>D. erecta</i>       | 0.45919      | 0.001732784 | 0.9836              | 0.707895     | 0.017014952 | 0.848054     | 0.005745507 | 0.96666             | ~             |  |     |
|              | <i>D. sechellia</i>    | 0.447482     | 0.007588511 | 0.0426 (*)          | 0.645112     | 0.004722755 | 0.846138     | 0.005623737 | <0.0001 (**)        | ~             |  |     |
|              | <i>D. simulans</i>     | 0.449712222  | 0.036259615 | <0.0001 (**)        | 0.614466667  | 0.020859836 | 0.758831667  | 0.008593839 | 0.5055              | ~             |  |     |
|              | <i>D. yakuba</i>       | 0.57927      | 0.011190764 | <0.0001 (**)        | 0.732412     | 0.021235083 | 0.86914      | 0.006233838 | 0.9401              | ~             |  |     |
| shab Site7   | <i>D. melanogaster</i> | 0.955945     | 0.014171951 | ~                   | 0.9782075    | 0.00252916  | 0.974525     | 0.002293936 | ~                   | ~             |  |     |
|              | <i>D. erecta</i>       | 0.930956     | 0.010482725 | 0.6425              | 0.9345       | 0.03150398  | 0.94901      | 0.014107407 | 0.5635              | ~             |  |     |
|              | <i>D. sechellia</i>    | 0.948716     | 0.013367353 | 0.9889              | 0.976892     | 0.00625312  | 0.977966     | 0.009977499 | 0.9839              | ~             |  |     |
|              | <i>D. simulans</i>     | 0.920332222  | 0.017619658 | 0.6131              | 0.959075     | 0.01557122  | 0.758831667  | 0.008593839 | <0.0001 (**)        | ~             |  |     |
|              | <i>D. yakuba</i>       | 0.923908     | 0.018170733 | 0.397               | 0.969908     | 0.01282367  | 0.86914      | 0.006233838 | <0.0001 (**)        | ~             |  |     |
| syt Site2    | <i>D. melanogaster</i> | 0.22147      | 0.01389     | ~                   | 0.32596      | 0.02050     | 0.30212      | 0.01880     | ~                   | ~             |  |     |
|              | <i>D. erecta</i>       | 0.31520      | 0.02655     | <0.0001 (**)        | 0.24444      | 0.00920     | 0.09734      | 0.01669     | <0.0001 (**)        | ~             |  |     |
|              | <i>D. sechellia</i>    | 0.34049      | 0.01406     | <0.0001 (**)        | 0.31156      | 0.01163     | 0.28656      | 0.01450     | 0.99990             | ~             |  |     |
|              | <i>D. simulans</i>     | 0.38160      | 0.00642     | <0.0001 (**)        | 0.30156      | 0.01566     | 0.17986      | 0.01182     | <0.0001 (**)        | ~             |  |     |
|              | <i>D. yakuba</i>       | 0.28543      | 0.02565     | 0.0438 (*)          | 0.35233      | 0.01102     | 0.20710      | 0.00914     | <0.0001 (**)        | ~             |  |     |
| syt Site3    | <i>D. melanogaster</i> | 0.48574      | 0.00797     | ~                   | 0.53323      | 0.00792     | 0.52377      | 0.01360     | ~                   | ~             |  |     |
|              | <i>D. erecta</i>       | 0.55218      | 0.00932     | <0.0001 (**)        | 0.43972      | 0.00549     | 0.33957      | 0.01588     | <0.0001 (**)        | ~             |  |     |
|              | <i>D. sechellia</i>    | 0.51417      | 0.00738     | <0.0001 (**)        | 0.47957      | 0.00798     | 0.56638      | 0.00965     | <0.0001 (**)        | ~             |  |     |
|              | <i>D. simulans</i>     | 0.55820      | 0.00650     | <0.0001 (**)        | 0.49193      | 0.01033     | 0.44880      | 0.01023     | 0.0004 (*)          | ~             |  |     |
|              | <i>D. yakuba</i>       | 0.47702      | 0.00693     | 0.90180             | 0.51904      | 0.00400     | 0.38913      | 0.00538     | <0.0001 (**)        | ~             |  |     |
| syt Site4    | <i>D. melanogaster</i> | 0.79006      | 0.00958     | ~                   | 0.84749      | 0.00496     | 0.80952      | 0.00981     | ~                   | ~             |  |     |
|              | <i>D. erecta</i>       | 0.80343      | 0.00958     | <0.0001 (**)        | 0.84020      | 0.00271     | 0.77217      | 0.00650     | <0.0001 (**)        | ~             |  |     |
|              | <i>D. sechellia</i>    | 0.77690      | 0.00385     | <0.0001 (**)        | 0.79669      | 0.00594     | 0.81588      | 0.00700     | <0.0001 (**)        | ~             |  |     |
|              | <i>D. simulans</i>     | 0.82692      | 0.00562     | <0.0001 (**)        | 0.82416      | 0.00767     | 0.80000      | 0.01822     | 0.16920             | ~             |  |     |
|              | <i>D. yakuba</i>       | 0.78644      | 0.01309     | 0.98750             | 0.84078      | 0.00453     | 0.76084      | 0.00315     | <0.0001 (**)        | ~             |  |     |
| unc          | <i>D. melanogaster</i> | 0.65665      | 0.00396     | ~                   | 0.75374      | 0.00470     | 0.43348      | 0.01408     | ~                   | ~             |  |     |
|              | <i>D. erecta</i>       | 0.60294      | 0.03345     | <0.0001 (**)        | 0.58952      | 0.01209     | 0.72011      | 0.01156     | <0.0001 (**)        | ~             |  |     |
|              | <i>D. sechellia</i>    | 0.52611      | 0.00366     | <0.0001 (**)        | 0.49625      | 0.00206     | 0.05450      | 0.00623     | <0.0001 (**)        | ~             |  |     |
|              | <i>D. simulans</i>     | 0.60778      | 0.00746     | <0.0001 (**)        | 0.50781      | 0.00389     | 0.06090      | 0.00687     | <0.0001 (**)        | ~             |  |     |
|              | <i>D. yakuba</i>       | 0.55108      | 0.00669     | <0.0001 (**)        | 0.34971      | 0.06286     | 0.73658      | 0.00473     | <0.0001 (**)        | ~             |  |     |
