# Supplementary material for: Dynamic response of RNA editing to temperature in Drosophila
Source: PubMed Central journal article supplement (PMC4299485; doi:10.1186/s12915-014-0111-3), 2015-01-03
Supplement: 12915_2014_111_MOESM12_ESM.pdf [file 12915_2014_111_MOESM12_ESM.pdf]

| Editing Site | <i>paralytic</i><br>HR Mutant | Editing 10°C | Different from<br>20°C? P-value | Standard<br>Error 10°C | Editing 20°C | Standard<br>Error 20°C | Editing 30°C | Different from<br>20°C? P-value | Standard<br>Error 30°C |
|--------------|-------------------------------|--------------|---------------------------------|------------------------|--------------|------------------------|--------------|---------------------------------|------------------------|
| para Site1   | LoxP Control                  | 0.36110      | 0.3485                          | 0.01398                | 0.30587      | 0.04839                | 0.13976      | 0.0015 (*)                      | 0.01558                |
|              | DCS delete                    | 0.18962      | 0.883                           | 0.00985                | 0.18421      | 0.00983                | 0.01752      | < .0001 (**)                    | 0.00983                |
|              | DCS zip                       | 0.60686      | 0.8407                          | 0.01816                | 0.58935      | 0.00821                | 0.55969      | 0.5934                          | 0.02487                |
|              | HP > α                        | 0.00323      | 0.2157                          | 0.00253                | 0.01092      | 0.00431                | 0.00462      | 0.3366                          | 0.00300                |
|              | ECS > α'                      | 0.01655      | 0.9847                          | 0.00307                | 0.01807      | 0.00526                | 0.01080      | 0.713                           | 0.01080                |
|              | HP/ECS > α/α'                 | 0.53255      | 0.0235 (*)                      | 0.01983                | 0.59817      | 0.01161                | 0.42008      | 0.0001 (*)                      | 0.00288                |
| para Site2   | LoxP Control                  | 0.28856      | 0.0671                          | 0.00999                | 0.21756      | 0.03504                | 0.08506      | 0.0025 (*)                      | 0.00451                |
|              | DCS delete                    | 0.18322      | 0.5988                          | 0.01521                | 0.20506      | 0.03136                | 0.02760      | < .0001 (**)                    | 0.00487                |
|              | DCS zip                       | 0.62686      | 0.5104                          | 0.00758                | 0.60431      | 0.01294                | 0.43827      | < .0001 (**)                    | 0.01590                |
|              | HP > α                        | 0.26466      | 0.001 (*)                       | 0.00756                | 0.30831      | 0.00785                | 0.09939      | < .0001 (**)                    | 0.00551                |
|              | ECS > α'                      | 0.47635      | 0.2022                          | 0.00675                | 0.44150      | 0.00990                | 0.20123      | < .0001 (**)                    | 0.02236                |
|              | HP/ECS > α/α'                 | 0.47281      | 0.0286 (*)                      | 0.01315                | 0.52226      | 0.00500                | 0.31288      | < .0001 (**)                    | 0.01172                |
| para Site3   | LoxP Control                  | 0.48616      | 0.0982                          | 0.00982                | 0.38758      | 0.05470                | 0.17251      | 0.0014 (*)                      | 0.00271                |
|              | DCS delete                    | 0.33500      | 0.917                           | 0.02052                | 0.32716      | 0.01434                | 0.07995      | < .0001 (**)                    | 0.00581                |
|              | DCS zip                       | 0.79443      | 0.1686                          | 0.01112                | 0.74003      | 0.01343                | 0.66182      | 0.0315 (*)                      | 0.02246                |
|              | HP > α                        | 0.45418      | 0.0007 (*)                      | 0.00783                | 0.50680      | 0.00845                | 0.21491      | < .0001 (**)                    | 0.00814                |
|              | ECS > α'                      | 0.61342      | 0.3952                          | 0.00964                | 0.57855      | 0.01183                | 0.31004      | < .0001 (**)                    | 0.03078                |
|              | HP/ECS > α/α'                 | 0.62363      | 0.043 (*)                       | 0.01171                | 0.67452      | 0.00803                | 0.44458      | < .0001 (**)                    | 0.01535                |

| Key      |
|----------|
| 1.000000 |
| 0.750000 |
| 0.500000 |
| 0.250000 |
| 0.000000 |

Slope (shape)

| Editing Site | <i>paralytic</i><br>HR Mutant | Slope 10-20°C<br>Different from Loxp? | Slope 20-30°C<br>Different from Loxp? |
|--------------|-------------------------------|---------------------------------------|---------------------------------------|
| para Site1   | DCS delete                    | 0.0013 (*)                            | 1.00000                               |
|              | DCS zip                       | 0.17770                               | <0.0001 (**)                          |
|              | HP > α                        | ~                                     | ~                                     |
|              | ECS > α'                      | ~                                     | ~                                     |
|              | HP/ECS > α/α'                 | 0.0002 (*)                            | 0.99380                               |
| para Site2   | DCS delete                    | <0.0001 (**)                          | 0.0047 (*)                            |
|              | DCS zip                       | 0.0152 (*)                            | 0.12730                               |
|              | HP > α                        | <0.0001 (**)                          | <0.0001 (**)                          |
|              | ECS > α'                      | 0.006 (*)                             | <0.0001 (**)                          |
|              | HP/ECS > α/α'                 | <0.0001 (**)                          | 0.0118 (*)                            |
| para Site3   | DCS delete                    | <0.0001 (**)                          | 0.25010                               |
|              | DCS zip                       | 0.16790                               | <0.0001 (**)                          |
|              | HP > α                        | <0.0001 (**)                          | 0.0007 (*)                            |
|              | ECS > α'                      | 0.0002 (*)                            | 0.0068 (*)                            |
|              | HP/ECS > α/α'                 | <0.0001 (**)                          | 0.98970                               |
