# Supplementary material for: Dynamic response of RNA editing to temperature in Drosophila
Source: PubMed Central journal article supplement (PMC4299485; doi:10.1186/s12915-014-0111-3), 2015-01-03

**A. LoxP control**

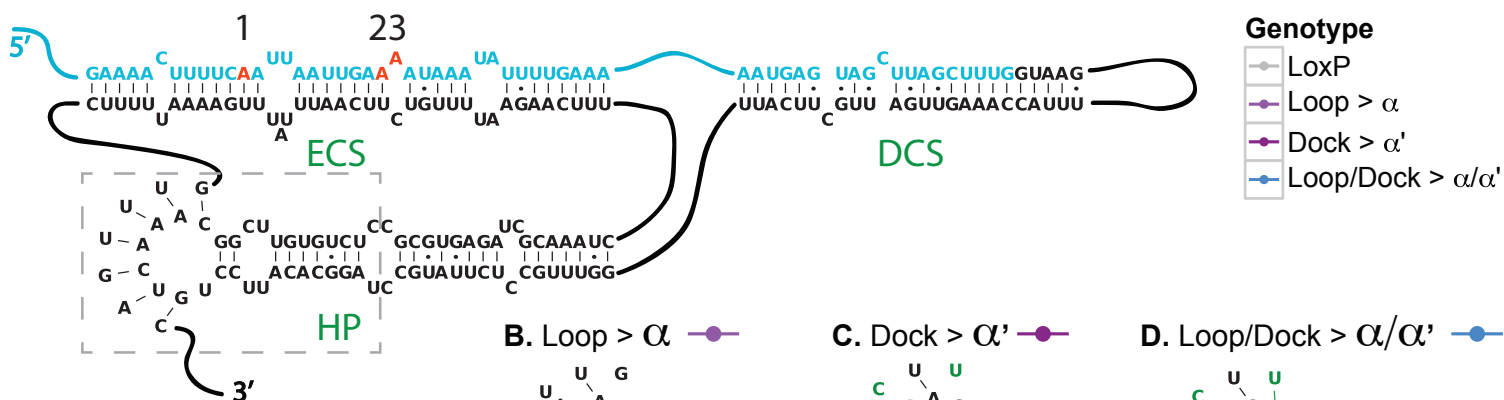

**B. Loop >  $\alpha$**

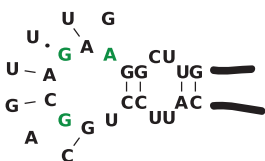

**C. Dock >  $\alpha'$**

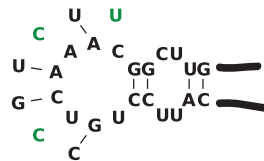

**D. Loop/Dock >  $\alpha/\alpha'$**

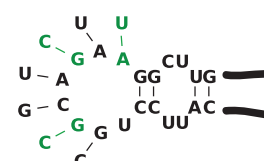

**E.**

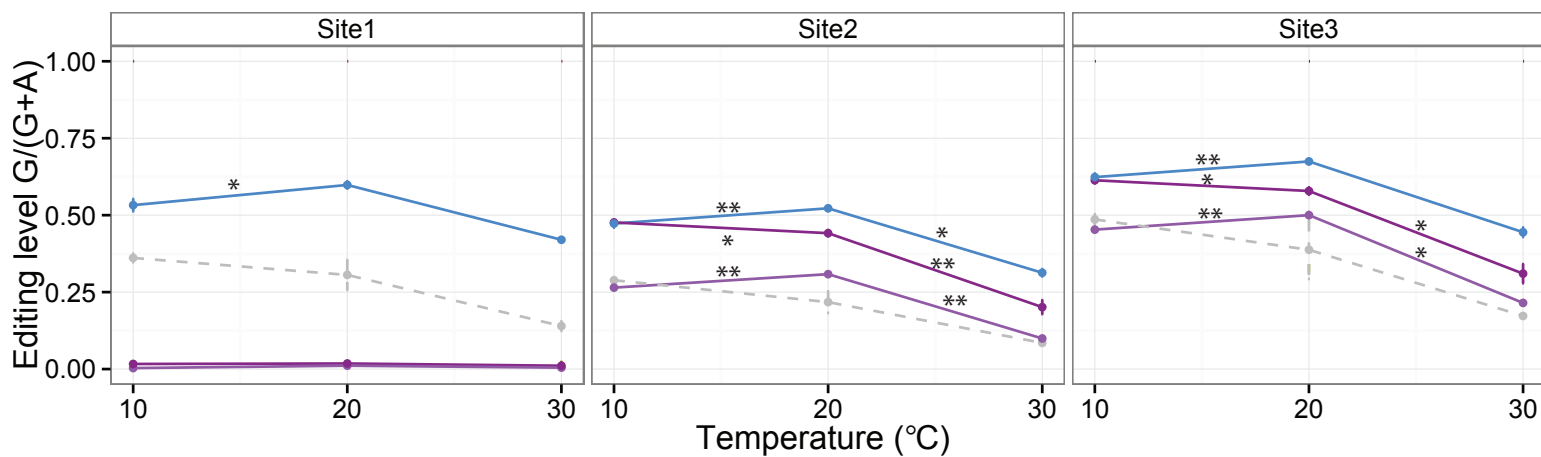

Supplement: 12915_2014_111_MOESM13_ESM.pdf [file 12915_2014_111_MOESM13_ESM.pdf]
