# Supplementary material for: Dynamic response of RNA editing to temperature in Drosophila
Source: PubMed Central journal article supplement (PMC4299485; doi:10.1186/s12915-014-0111-3), 2015-01-03

**A. Synaptotagmin-1 (*syt*)**

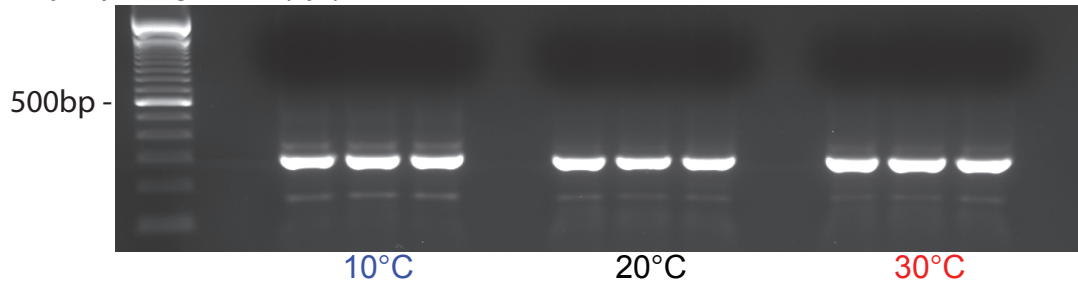

**B. Paralytic (*para*)**

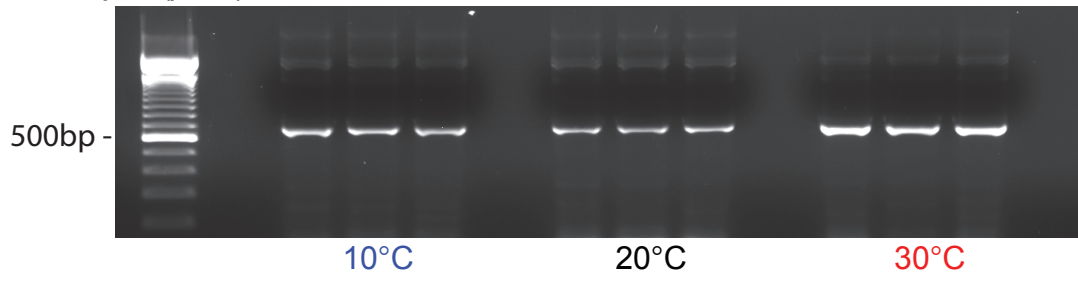

**C. *Shab***

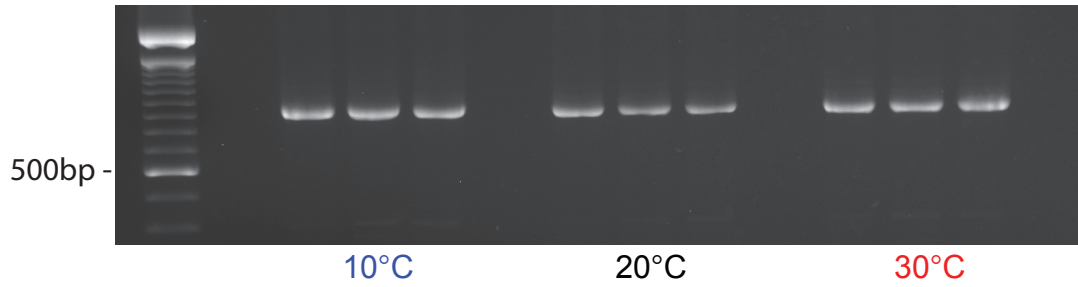

Supplement: 12915_2014_111_MOESM14_ESM.pdf [file 12915_2014_111_MOESM14_ESM.pdf]
