# Supplementary material for: Dynamic response of RNA editing to temperature in Drosophila
Source: PubMed Central journal article supplement (PMC4299485; doi:10.1186/s12915-014-0111-3), 2015-01-03

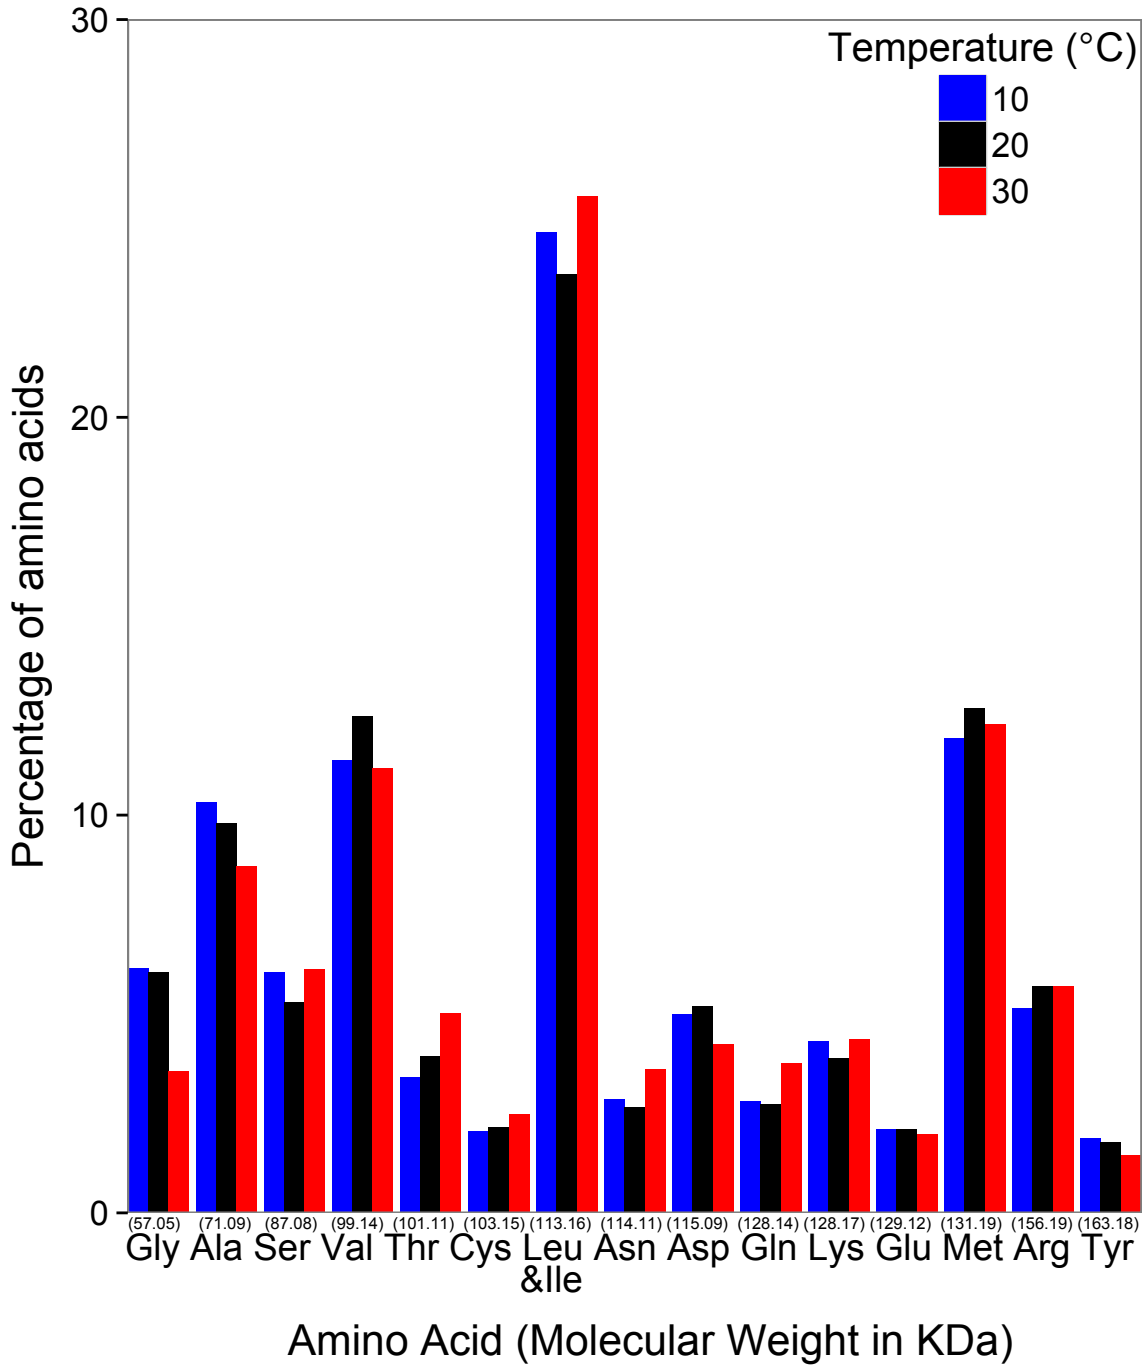

Supplement: 12915_2014_111_MOESM15_ESM.pdf [file 12915_2014_111_MOESM15_ESM.pdf]
